# Supplementary material for: The Genetic Diversity of Rickettsiella Symbionts in Ixodes ricinus Throughout Europe
Source: PubMed Central journal article supplement (PMC9436858; doi:10.1007/s00248-021-01869-7), 2021-09-28
Supplement: 248_2021_1869_MOESM1_ESM.pdf [file 248_2021_1869_MOESM1_ESM.pdf]

Table S1. Percentage of genetic variability (*up*) based on *gidA*-nucleotide and amino acids sequences within and among different *Rickettsiella* populations infecting *Ixodes ricinus*.

|        |  | <i>up</i> (%) [min. – max.] |                  |                  |                  |             |               |               |               |
|--------|--|-----------------------------|------------------|------------------|------------------|-------------|---------------|---------------|---------------|
|        |  | Nucleotides                 |                  |                  |                  | Amino acids |               |               |               |
| Clades |  | I                           | II               | III              | IV               | I           | II            | III           | IV            |
| I      |  | 0.4 [0-1.7]                 | 13.2 [12.5–13.7] | 13.7 [11.3–14.8] | 14.3 [13.9–15.0] | 0.5 [0–2.8] | 7.4 [6.0–9.1] | 7.5 [6.5–9.1] | 7.3 [6.6–9.1] |
| II     |  |                             | 0.07 [0–0.3]     | 11.7 [11.3–12.6] | 13.0 [12.2–13.5] |             | 0.2 [0–0.8]   | 7.5 [6.6–8.3] | 7.8 [7.1–8.7] |
| III    |  |                             |                  | 0.58 [0–3.9]     | 15.5 [14.5–16.0] |             |               | 0.5 [0–3.3]   | 8.2 [6.8–9.5] |
| IV     |  |                             |                  |                  | 2.0 [0–4.8]      |             |               |               | 1.5 [0-3.3]   |

Table S2. Protein sequence motifs of a fragment of *gidA* gene of *Rickettsiella* spp. obtained from questing *Ixodes ricinus* populations collected from different European regions.

|                  | 12 | 13 | 26 | 33 | 35 | 38 | 41 | 49 | 52 | 72 | 80 | 82 | 84 | 94 | 111 | 114 | 115 | 116 | 122 | 124 | 135 | 136 | 140 | 148 | 152 | 174 | 236 | 239 |
|------------------|----|----|----|----|----|----|----|----|----|----|----|----|----|----|-----|-----|-----|-----|-----|-----|-----|-----|-----|-----|-----|-----|-----|-----|
| <b>Clade I</b>   | N  | A  | S  | Q  | N  | V  | M  | Y  | T  | A  | P  | S  | S  | F  | T   | C   | E   | I   | S   | N   | V   | V   | A   | Y   | K   | V   | A   | T   |
|                  | N  | A  | S  | Q  | N  | V  | M  | Y  | T  | A  | P  | S  | S  | F  | T   | C   | E   | I   | S   | N   | V   | V   | T   | Y   | K   | V   | A   | T   |
| <b>Clade II</b>  | Y  | A  | S  | Q  | N  | A  | I  | Y  | A  | A  | P  | A  | S  | L  | T   | Y   | S   | V   | S   | Y   | R   | D   | A   | Y   | K   | I   | T   | L   |
|                  | Y  | A  | S  | Q  | N  | A  | I  | Y  | T  | A  | P  | A  | S  | L  | T   | Y   | S   | V   | S   | Y   | R   | D   | A   | Y   | K   | I   | T   | L   |
| <b>Clade III</b> | Y  | A  | S  | E  | D  | V  | V  | C  | T  | A  | P  | A  | S  | L  | T   | Y   | S   | I   | S   | K   | I   | E   | K   | Y   | K   | V   | A   | I   |
|                  | Y  | T  | S  | E  | D  | V  | V  | C  | T  | A  | S  | A  | S  | L  | T   | Y   | S   | I   | S   | D   | I   | E   | K   | H   | K   | V   | A   | I   |
|                  | Y  | A  | S  | E  | D  | V  | V  | C  | T  | A  | S  | A  | S  | L  | T   | Y   | S   | I   | S   | E   | I   | E   | K   | H   | K   | V   | A   | I   |
| <b>Clade IV</b>  | K  | T  | G  | Q  | N  | V  | V  | Y  | A  | A  | P  | A  | F  | L  | S   | F   | E   | V   | S   | N   | I   | E   | T   | Y   | K   | I   | A   | T   |
|                  | K  | T  | G  | Q  | N  | V  | V  | Y  | A  | A  | P  | A  | F  | L  | S   | F   | K   | V   | S   | N   | I   | E   | T   | Y   | R   | I   | A   | T   |
|                  | K  | T  | G  | Q  | N  | V  | V  | Y  | A  | S  | P  | A  | F  | L  | S   | F   | K   | V   | S   | N   | I   | E   | T   | Y   | R   | I   | A   | T   |

**NOTE:**

A = Alanine

I = Isoleucine

R = Arginine

C = Cysteine

K = Lysine

S = Serine

D = Aspartic acid

L = Leucine

T = Threonine

E = Glutamic acid

M = Methionine

V = Valine

F = Phenylalanine

N = Asparagine

Y = Tyrosine

G = Glycine

P = Proline

H = Histidine

Q = Glutamine
